# Supplementary material for: Diffusion-Weighted MR Enterography to Monitor Bowel Inflammation after Medical Therapy in Crohn's Disease: A Prospective Longitudinal Study
Source: PubMed Central journal article supplement — Korean J Radiol. 2017 Jan 5;18(1):162–72. doi: 10.3348/kjr.2017.18.1.162 (PMC5240495; doi:10.3348/kjr.2017.18.1.162), 2017-01-05
Supplement: kjr-18-162-s001.pdf [file kjr-18-162-s001.pdf]

**Supplementary Table 1. MRE Scan Parameters**

| Parameter                        | T2-Weighted Half-Fourier Sequence |             | T2-Like, Steady-State Gradient-Echo Sequence |            | Diffusion-Weighted Imaging*                  | T1-Weighted, Contrast-Enhanced Sequence <sup>†</sup> |            |
|----------------------------------|-----------------------------------|-------------|----------------------------------------------|------------|----------------------------------------------|------------------------------------------------------|------------|
|                                  | Coronal                           |             | Coronal                                      | Transverse | Coronal                                      | Coronal                                              | Transverse |
| Fat saturation                   | No                                | Yes         | Yes                                          | Yes        | Yes                                          | Yes                                                  | Yes        |
| Repetition time/echo time (msec) | Infinite/80                       | Infinite/80 | 2.8/1.4                                      | 2.5/1.2    | 5118–6824/68                                 | 3.2/1.6                                              | 3.3/1.6    |
| Flip angle (degree)              | 90                                | 90          | 60                                           | 60         | 90                                           | 10                                                   | 10         |
| Field of view (mm)               | 400                               | 400         | 450                                          | 350        | 420                                          | 400                                                  | 320        |
| Matrix                           | 400 x 220                         | 400 x 220   | 224 x 224                                    | 230 x 200  | 100 x 100, separately for abdomen and pelvis | 400 x 350                                            | 304 x 253  |
| Parallel imaging factor          | 5                                 | 5           | 2                                            | 2          | 5                                            | 3                                                    | 1.8        |
| b-factor (s/mm <sup>2</sup> )    |                                   |             |                                              |            | 0 and 900                                    |                                                      |            |
| Echoplanar imaging factor        |                                   |             |                                              |            | 21                                           |                                                      |            |
| Number of averaging              | 1                                 | 1           | 1                                            | 3          | 4                                            | 1                                                    | 1          |
| Slice thickness/gap (mm)         | 5/0                               | 5/0         | 3/0                                          | 5/0        | 5/0                                          | 3/0                                                  | 5/0        |

\*Additional diffusion-weighted imaging-related technical details were as follows: fat suppression using short tau inversion recovery; band width, 1942.4 Hz; no interpolation; and echo spacing, 0.25 msec. <sup>†</sup>Values were obtained using volumetric, T1-weighted, dynamic spoiled gradient-echo sequence. Scan delay was determined with bolus trigger method using MR fluoroscopy technique. Data acquisition for enteric phase was initiated 7 seconds after contrast first arrived at iliac bifurcation. Subsequent phases were obtained continuously after brief period of patient breathing following completion of prior phase. MRE = MR enterography
